# Supplementary material for: An Abelisauroid Theropod Dinosaur from the Turonian of Madagascar
Source: PubMed Central journal article supplement (PMC3630149; doi:10.1371/journal.pone.0062047), 2013-04-18

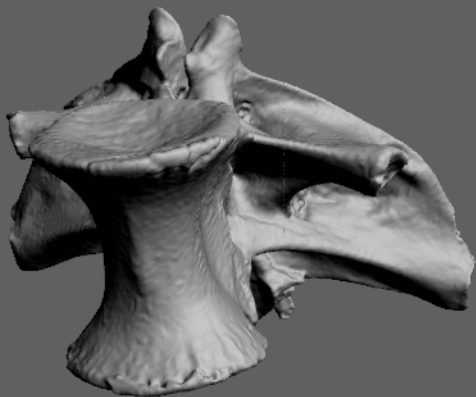

Supplement: pone.0062047.s005.pdf [file pone.0062047.s005.pdf]
